# Supplementary material
Source: publisher figshare collection journal article supplement (https://gsajournals.figshare.com/ndownloader/files/12231425)
Supplement: Supplementary file 1 [file 12231425]

**Table S7.** PCR primers used to genotype SNPs.

| Variation | Enzyme | Primer F | Primer R |
| --- | --- | --- | --- |
| *WBVar00162868* | DraI | AAGAGGTGTTCTTCTGCAGC | ACCATCCACGCAGTTCATTC |
| *WBVar00168595* | EcoRI | ATTCCAACTCCAGTCCAATATTATTCAATGTACTTGGTCAGTGCTGGGAA | CAAAAATATTGGTGTCAGTGGG |
| *WBVar02075879* | / (deletion) | GGTACTGTATGTTTGGTGGAAA | CTGTTAAACGGCTCAGTTGGC |
| *WBVar00182816* | HindIII | CTTCTACCAGTTTAAAGGAGGG | GTGATAACTCCCAGAATCATTC |
| *WBVar00187093* | DraI | ACTTTCAGCTGCTCGTACTCTC | TCTGCCTTTTCACTTGCC |
| *WBVar00199552* | EcoRI | CGGCGGACCTCTACTATGG | CGACATCTACCGGGCTTTG |
| *WBVar01978866* | DraI | GTGTGCTCGGAGATTTGACGAC | AAATGAGAAATGCAGTACAAAATGA |
| *WBVar00077997* | DraI | GCAGGAGGAAAACGATACAG | TGAGAGTGGAGAGCGTAGTTG |
| *WBVar02091917* | DraI | GTTGTTTTATTGCACAGATTACGG | CACGAGCAAGTAACGTCTGCAC |
